# Supplementary material
Source: ML conference proceedings conference paper supplement (https://proceedings.mlr.press/v130/lemercier21a.html)
Supplement: Supplementary file 1 [file lemercier21a-supp.pdf]

---

# Supplementary: Distribution Regression for Sequential Data

---

## A PROOFS

In this section, we prove that the expected signature  $\mathbb{E}S$  is weakly continuous (Appendix A.1), and that the pathwise expected signature  $\Phi$  is injective and weakly continuous (Appendix A.2).

Recall that in the main paper we consider a compact subset of paths  $\mathcal{X} \subset \mathcal{C}(I, E)$ , where  $I$  is a closed interval and  $E$  is a Banach space of dimension  $d$  (possibly infinite, but countable). We will denote by  $\mathcal{P}(\mathcal{X})$  the set of Borel probability measures on  $\mathcal{X}$  and by  $S(\mathcal{X}) \subset \mathcal{T}(E)$  the image of  $\mathcal{X}$  by the signature  $S : \mathcal{C}(I, E) \rightarrow \mathcal{T}(E)$ .

As shown in (Chevyrev and Oberhauser, 2018, Section 3), if  $E$  is a Hilbert space with inner product  $\langle \cdot, \cdot \rangle_E$ , then for any  $k \geq 1$  the following bilinear form defines an inner product on  $E^{\otimes k}$

$$\langle e_{i_1} \otimes \dots \otimes e_{i_k}, e_{j_1} \otimes \dots \otimes e_{j_k} \rangle_{E^{\otimes k}} = \prod_{r=1}^k \delta_{i_r, j_r}, \quad \delta_{ij} = \begin{cases} 1, & \text{if } i = j, \\ 0, & \text{if } i \neq j. \end{cases} \quad (1)$$

which extends by linearity to an inner product  $\langle A, B \rangle_{\mathcal{T}(E)} = \sum_{k \geq 0} \langle A_k, B_k \rangle_{E^{\otimes k}}$  on  $\mathcal{T}(E)$  that thus becomes also a Hilbert space.

### A.1 Weak continuity of the expected signature

**Definition A.1.** A sequence of probability measures  $\mu_n \in \mathcal{P}(\mathcal{X})$  converges weakly to  $\mu$  if for every  $f \in C_b(\mathcal{X}, \mathbb{R})$  we have  $\int_{\mathcal{X}} f d\mu_n \rightarrow \int_{\mathcal{X}} f d\mu$  as  $n \rightarrow \infty$ , where  $C_b(\mathcal{X}, \mathbb{R})$  is the space of real-valued continuous bounded functions on  $\mathcal{X}$ .

**Remark.** Since  $\mathcal{X}$  is a compact metric space, we can drop the word "bounded" in Def. A.1.

**Definition A.2.** Given two probability measures  $\mu, \nu \in \mathcal{P}(\mathcal{X})$ , the Wasserstein-1 distance is defined as follows

$$W_1(\mu, \nu) = \inf_{\gamma \in \Pi(\mu, \nu)} \int_{x, y \in \mathcal{X}} \|x - y\|_{Lip} d\gamma(x, y) \quad (2)$$

where the infimum is taken over all possible couplings of  $\mu$  and  $\nu$ .

**Lemma A.1.** (Chevyrev and Oberhauser, 2018, Theorem 5.3) The signature  $S : \mathcal{C}(I, E) \rightarrow \mathcal{T}(E)$  is injective.<sup>1</sup>

**Lemma A.2.** (Chevyrev et al., 2016, Corollary 5.5) The signature  $S : \mathcal{C}(I, E) \rightarrow \mathcal{T}(E)$  is continuous w.r.t.  $\|\cdot\|_{Lip}$ .

**Lemma A.3.** (Chevyrev and Oberhauser, 2018, Theorem 5.6) The expected signature  $\mathbb{E}S : \mathcal{P}(\mathcal{X}) \rightarrow \mathcal{T}(E)$  is injective.<sup>2</sup>

**Theorem A.1.** The expected signature  $\mathbb{E}S : \mathcal{P}(\mathcal{X}) \rightarrow \mathcal{T}(E)$  is weakly continuous.

*Proof.* Consider a sequence  $\{\mu_n\}_{n \in \mathbb{N}}$  of probability measures on  $\mathcal{P}(\mathcal{X})$  converging weakly to a measure  $\mu \in \mathcal{P}(\mathcal{X})$ . By Lemma A.2 the signature  $S : x \mapsto S(x)$  is continuous w.r.t.  $\|\cdot\|_{Lip}$ . Hence, by definition of weak-convergence (and because  $\mathcal{X}$  is compact), for any  $k > 0$  and any multi-index  $(i_1, \dots, i_k) \in \{1, \dots, d\}^k$  it follows that  $\int_{x \in \mathcal{X}} S(x)^{(i_1, \dots, i_k)} \mu_n(dx) \rightarrow \int_{x \in \mathcal{X}} S(x)^{(i_1, \dots, i_k)} \mu(dx)$ . The factorial decay given by (Lyons et al., 2007, Proposition 2.2) yields  $\int_{x \in \mathcal{X}} S(x) \mu_n(dx) \rightarrow \int_{x \in \mathcal{X}} S(x) \mu(dx)$  in the topology induced by  $\langle \cdot, \cdot \rangle_{\mathcal{T}(E)}$ .  $\square$

<sup>1</sup>Up to tree-like equivalence (see (Chevyrev and Oberhauser, 2018, appendix B) for a definition and detailed discussion).

<sup>2</sup>This result was firstly proved in Fawcett (2002) for probability measures supported on compact subsets of  $\mathcal{C}(I, E)$ , which is enough for this paper. It was also proved in a more abstract setting in Chevyrev et al. (2016). The authors of Chevyrev and Oberhauser (2018) introduce a normalization that is not needed in case of compact supports, as they mention in (Chevyrev and Oberhauser, 2018, (I) - page 2)

## A.2 Injectivity and weak continuity of the pathwise expected signature

**Theorem A.2.** (Lyons et al., 2007, Theorem 3.7) Let  $x \in \mathcal{C}(I, E)$  and recall the definition of the projection  $\Pi_t : x \mapsto x|_{[a, t]}$ . Then, the  $\mathcal{T}(E)$ -valued path defined by

$$S_{path}(x) : t \mapsto S \circ \Pi_t(x) \quad (3)$$

is Lipschitz continuous. Furthermore the map  $x \mapsto S_{path}(x)$  is continuous w.r.t.  $\|\cdot\|_{Lip}$ .

**Theorem A.3.** The pathwise expected signature  $\Phi : \mathcal{P}(\mathcal{X}) \rightarrow \mathcal{C}(I, \mathcal{T}(E))$  is injective.<sup>3</sup>

*Proof.* Let  $\mu, \nu \in \mathcal{P}(\mathcal{X})$  be two probability measures. If  $\Phi(\mu) = \Phi(\nu)$ , then for any  $t \in I$ ,  $\mathbb{E}_{x \sim \mu}[S \circ \Pi_t(x)] = \mathbb{E}_{y \sim \nu}[S \circ \Pi_t(y)]$ . In particular, for  $t = T$ ,  $\mathbb{E}S(\mu) = \mathbb{E}_{x \sim \mu}[S(x)] = \mathbb{E}_{y \sim \nu}[S(y)] = \mathbb{E}S(\nu)$ . The result follows from the injectivity of the expected signature  $\mathbb{E}S$  (Lemma A.3).  $\square$

**Theorem A.4.** The pathwise expected signature  $\Phi : \mathcal{P}(\mathcal{X}) \rightarrow \mathcal{C}(I, \mathcal{T}(E))$  is weakly continuous.

*Proof.* Let  $\{\mu_n\}_{n \in \mathbb{N}}$  be a sequence in  $\mathcal{P}(\mathcal{X})$  converging weakly to  $\mu \in \mathcal{P}(\mathcal{X})$ . As  $S_{path}$  is continuous (Thm. A.2), it follows, by the *continuous mapping theorem*, that  $S_{path} \# \mu_n \rightarrow S_{path} \# \mu$  weakly, where  $S_{path} \# \mu$  is the pushforward measure of  $\mu$  by  $S_{path}$ . Given that  $S_{path}$  is continuous and  $\mathcal{X}$  is compact, it follows that the image  $S_{path}(\mathcal{X})$  is a compact subset of the Banach space  $\mathcal{C}(I, \mathcal{T}(E))$ . By (Villani, 2008, Theorem 6.8) weak convergence of probability measures on compact supports is equivalent to convergence in *Wasserstein-1 distance*. By *Jensen's inequality*  $\|\mathbb{E}[S_{path} \# \mu_n] - \mathbb{E}[S_{path} \# \mu]\|_{Lip} \leq \mathbb{E}[\|S_{path} \# \mu_n - S_{path} \# \mu\|_{Lip}]$ . Taking the infimum over all couplings  $\gamma \in \Pi(S_{path} \# \mu_n, S_{path} \# \mu)$  on the right-hand-side of the previous equation we obtain  $\|\mathbb{E}[S_{path} \# \mu_n] - \mathbb{E}[S_{path} \# \mu]\|_{Lip} \leq W_1(S_{path} \# \mu_n, S_{path} \# \mu) \rightarrow 0$ , which yields the convergence  $\mathbb{E}[S_{path} \# \mu_n] \rightarrow \mathbb{E}[S_{path} \# \mu]$  in  $\|\cdot\|_{Lip}$  over  $\mathcal{C}(I, \mathcal{T}(E))$ . Noting that  $\mathbb{E}[S_{path} \# \mu] = \Phi(\mu)$  concludes the proof.  $\square$

## B EXPERIMENTAL DETAILS

In our experiments we benchmark KES and SES against DeepSets and DR- $k_1$  where  $k_1 \in \{\text{RBF}, \text{Matern32}, \text{GA}\}$ . Both KES and SES do not take into account the length of the input time-series. Apart from DR-GA, all other baselines are designed to operate on vectorial data. Therefore, in order to deploy them in the setting of DR on sequential data, manual pre-processing (such as padding) is required. In the next section we describe how we turn discrete time-series into continuous paths on which the signature operates.

### B.1 Transforming discrete time-series into continuous paths

Consider a  $d$ -dimensional time-series of the form  $\mathbf{x} = \{(t_1, \mathbf{x}_1), \dots, (t_\ell, \mathbf{x}_\ell)\}$  with time-stamps  $t_1 \leq \dots \leq t_\ell$  and values  $\mathbf{x}_k \in \mathbb{R}^d$ , and the continuous path  $x$  obtained by linearly interpolating between the points  $\mathbf{x}_1, \dots, \mathbf{x}_\ell$ . The signature (truncated at level  $n$ ) of  $x$  can be computed explicitly with existing Python packages Reizenstein and Graham (2020); Lyons (2010); Kidger and Lyons (2020), does not depend on the time-stamps  $(t_1, \dots, t_{\ell_{i,j}})$ , and produces  $(d^{n+1} - 1)/(d - 1)$  terms when  $d > 1$ . When  $d = 1$  the signature is trivial since  $S^{\leq n}(x) = (1, (x_{t_\ell} - x_{t_1}), \frac{1}{2}(x_{t_\ell} - x_{t_1})^2, \dots, \frac{1}{n!}(x_{t_\ell} - x_{t_1})^n)$ . As mentioned in Sec. 2.5 we can simply augment the paths with a monotonous coordinate, such that  $\hat{x} : t \mapsto (t, x_t)$ , where  $t \in [a, T]$ , effectively reintroducing a time parametrization. Another way to augment the state space of the data and obtain additional signature terms is the *lead-lag* transformation (see Def. B.1) which turns a 1-d data stream into a 2-d path. For example if the data stream is  $\{1, 5, 3\}$  one obtains the 2-d continuous path  $\hat{x} : t \mapsto (x_t^{(lead)}, x_t^{(lag)})$  where  $x^{(lead)}$  and  $x^{(lag)}$  are the linear interpolations of  $\{1, 5, 5, 3, 3\}$  and  $\{1, 1, 5, 5, 3\}$  respectively. A key property of the lead-lag transform is that the difference between  $S(\hat{x})^{(1,2)}$  and  $S(\hat{x})^{(2,1)}$  is the quadratic variation  $QV(x) = \sum_{k=1}^{\ell-1} (x_{t_{k+1}} - x_{t_k})^2$  Chevyrev and Kormilitzin (2016). Hence, even when  $d > 1$ , it may be of interest to lead-lag transform the coordinates of the paths for which the quadratic variation is important for the task at hand.

<sup>3</sup>For any  $\mu \in \mathcal{P}(\mathcal{X})$  the path  $\Phi(\mu) \in \mathcal{C}(I, \mathcal{T}(E))$ . Indeed  $\Phi(\mu)$  is a continuous path because  $x, \Pi_t, S$  and  $\Phi$  are all continuous and the composition of continuous functions is continuous. The Lipschitzianity comes from the fact that  $\|\Phi(\mu)\|_{Lip} \leq \mu(\mathcal{X}) \sup_{x \in \mathcal{X}} \|S_{path}(x)\|_{Lip} < +\infty$  by Thm. A.2.

---

**Definition B.1** (Lead-lag). *Given a sequence of points  $\mathbf{x} = \{\mathbf{x}_1, \dots, \mathbf{x}_\ell\}$  in  $\mathbb{R}^d$  the lead-lag transform yields two new sequences  $\mathbf{x}^{(lead)}$  and  $\mathbf{x}^{(lag)}$  of length  $2\ell - 1$  of the following form*

$$\mathbf{x}_p^{(lead)} = \begin{cases} \mathbf{x}_k & \text{if } p = 2k - 1 \\ \mathbf{x}_k & \text{if } p = 2k - 2. \end{cases} \quad \mathbf{x}_p^{(lag)} = \begin{cases} \mathbf{x}_k & \text{if } p = 2k - 1 \\ \mathbf{x}_k & \text{if } p = 2k. \end{cases}$$

In our experiments we add time and lead-lag all coordinates except for the first task which consists in inferring the phase of an electronic circuit (see Sec. 5.1 in the main paper).

## B.2 Implementation details

The distribution regression methods (including DR- $k_1$ , KES and SES) are implemented on top of the Scikit-learn library Pedregosa et al. (2011), whilst we use the existing codebase <https://github.com/manzilzaheer/DeepSets> for DeepSets.

### B.2.1 KES

The KES algorithm relies on the signature kernel trick which is referred to as PDESolve in the main paper. In the algorithm below we outline the finite difference scheme we use for the experiments. In all the experiments presented in the main paper, the discretization level of the PDE solver is fixed to  $n = 0$  such that the time complexity to approximate the solution of the PDE is  $\mathcal{O}(d\ell^2)$  where  $\ell$  is the length of the longest data stream.

---

#### Algorithm 1 PDESolve

---

- 1: **Input:** two streams  $\{\mathbf{x}_k\}_{k=1}^{\ell_x}$ ,  $\{\mathbf{y}_k\}_{k=1}^{\ell_y}$  of dimension  $d$  and discretization level  $n$  (step size =  $2^{-n}$ )
  - 2: Create array  $U$  to store the solution of the PDE
  - 3: Initialize  $U[i, :] \leftarrow 1$  for  $i \in \{1, 2, \dots, 2^n * (\ell_x - 1) + 1\}$
  - 4: Initialize  $U[:, j] \leftarrow 1$  for  $j \in \{1, 2, \dots, 2^n * (\ell_y - 1) + 1\}$
  - 5: **for** each  $i \in \{1, 2, \dots, 2^n * (\ell_x - 1)\}$  **do**
  - 6:   **for** each  $j \in \{1, 2, \dots, 2^n * (\ell_y - 1)\}$  **do**
  - 7:      $\Delta_{\mathbf{x}} = (\mathbf{x}_{\lceil i/(2^n) \rceil + 1} - \mathbf{x}_{\lceil i/(2^n) \rceil}) / 2^n$
  - 8:      $\Delta_{\mathbf{y}} = (\mathbf{y}_{\lceil j/(2^n) \rceil + 1} - \mathbf{y}_{\lceil j/(2^n) \rceil}) / 2^n$
  - 9:      $U[i + 1, j + 1] = U[i, j + 1] + U[i + 1, j] + (\Delta_{\mathbf{x}}^T \Delta_{\mathbf{y}} - 1.) * U[i, j]$
  - 10: **Output:** The solution of the PDE at the final times  $U[-1, -1]$
- 

### B.2.2 SES

The SES algorithm from the main paper relies on an algebraic property for fast computation of signatures, known as Chen’s relation. Given a piecewise linear path  $x = \Delta x_{t_2} \star \dots \star \Delta x_{t_\ell}$  given by the concatenation  $\star$  of individual increments  $\mathbb{R}^d \ni \Delta x_{t_k} = x_{t_k} - x_{t_{k-1}}$ ,  $k = 2, \dots, \ell$ , one has  $S(x) = \exp(\Delta x_{t_2}) \otimes \dots \otimes \exp(\Delta x_{t_\ell})$ , where  $\exp$  denotes the tensor exponential and  $\otimes$  the tensor product. Using Chen’s relation, computing the signature (truncated at level  $n$ ) of a sequence of length  $\ell$  has complexity  $\mathcal{O}(\ell d^n)$ .

### B.2.3 Baselines

For the kernel-based baselines DR- $k_1$ , we perform Kernel Ridge regression with the kernel defined by  $k(\delta^i, \delta^j) = \exp(-\sigma^2 \|\rho(\delta^i) - \rho(\delta^j)\|_{\mathcal{H}_1}^2)$ , where  $\rho(\delta^i) = N_i^{-1} \sum_{p=1}^{N_i} k_1(\cdot, x^{i,p})$ . For  $k_1 \in \{\text{RBF}, \text{Matern32}\}$ , if the time-series are multi-dimensional, the dimensions are stacked to form one large vector  $x \in \mathbb{R}^{d\ell}$ . See Table 1 for the expressions of the kernels  $k_1$  used as baselines.

Table 1: Kernels  $k_1$  for the kernel-based baselines. See Cuturi and Blondel (2017) for the definition of  $\text{dtw}_{1/\gamma}$  in the GA kernel.

|          |                                                                        |
|----------|------------------------------------------------------------------------|
| RBF      | $\exp(-\gamma^2 \ x - x'\ ^2)$                                         |
| Matern32 | $(1 + \sqrt{3}\gamma^2 \ x - x'\ ) \exp(-\sqrt{3}\gamma^2 \ x - x'\ )$ |
| GA       | $\exp(-\gamma \text{dtw}_{1/\gamma}(x, x'))$                           |

For DeepSets, the two neural networks are feedforward neural networks with ELU activations. We train by minimizing the mean squared error.

### B.3 Hyperparameter selection

All models are run 5 times. The hyperparameters of KES, SES and DR- $k_1$  are selected by cross-validation via a grid search on the training set (80% of the data selected at random) of each run. The range of values for each parameter is specified in Table 2.

Table 2: Range of values for each parameter of DR- $k_1$ , KES and SES. We denote by  $\alpha$  the regularization parameter in Kernel Ridge regression and Lasso regression. The kernels parameters  $\gamma$  and  $\sigma$  are expressed in terms of lengthscales  $\ell_1$  and  $\ell_2$  such that  $\gamma^2 = 1/(2\ell_1^2)$  and  $\sigma^2 = 1/(2\ell_2^2)$ .

| Model       | $\ell_1$                                  | $\ell_2$                                  | $\alpha$                                  | $n$        | $m$     |
|-------------|-------------------------------------------|-------------------------------------------|-------------------------------------------|------------|---------|
| DR-RBF      | $\{10^{-3}, 10^{-2}, \dots, 10^2, 10^3\}$ | $\{10^{-3}, 10^{-2}, \dots, 10^2, 10^3\}$ | $\{10^{-3}, 10^{-2}, \dots, 10^2, 10^3\}$ | N/A        | N/A     |
| DR-Matern32 | $\{10^{-3}, 10^{-2}, \dots, 10^2, 10^3\}$ | $\{10^{-3}, 10^{-2}, \dots, 10^2, 10^3\}$ | $\{10^{-3}, 10^{-2}, \dots, 10^2, 10^3\}$ | N/A        | N/A     |
| DR-GA       | $\{7 \cdot 10^1, 7 \cdot 10^2\}$          | $\{10^{-3}, 10^{-2}, \dots, 10^2, 10^3\}$ | $\{10^{-3}, 10^{-2}, \dots, 10^2, 10^3\}$ | N/A        | N/A     |
| KES         | N/A                                       | $\{10^{-3}, 10^{-2}, \dots, 10^2, 10^3\}$ | $\{10^{-3}, 10^{-2}, \dots, 10^2, 10^3\}$ | N/A        | N/A     |
| SES         | N/A                                       | N/A                                       | $\{10^{-5}, 10^{-4}, \dots, 10^4, 10^5\}$ | $\{2, 3\}$ | $\{2\}$ |

## C ADDITIONAL RESULTS

### C.1 Additional performance metrics

We report the mean absolute percentage error (MAPE) as well as the computational time on two synthetic examples (the ideal gas and the rough volatility examples). As discussed in the main paper, these two datasets represent two data regimes: in one case (the rough volatility model) there is a high number of low dimensional time-series (see Fig. 1), whilst in the other case (ideal gas), there is a relatively small number of time-series with a higher state-space dimension. Apart from DeepSets (which is run on a GPU), all other models are run on a 128 cores CPU.

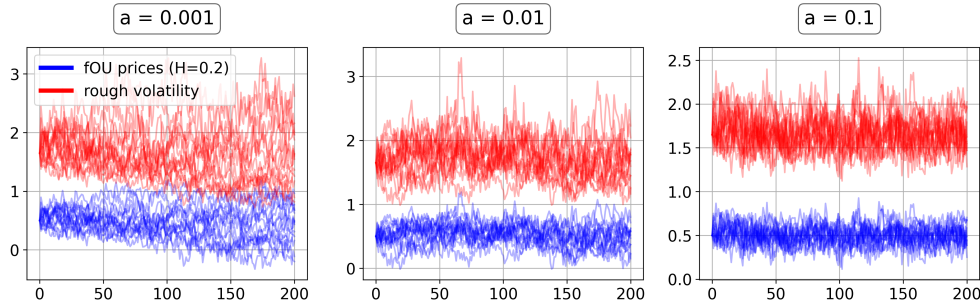

Figure 1: Visualization of fOU sample-paths and their corresponding volatility. Each panel corresponds to a different mean-reversion parameter  $a \in \{0.001, 0.01, 0.1\}$ .

Table 3: Ideal gas example

| Model       | Predictive MAPE |               | Time (s) |
|-------------|-----------------|---------------|----------|
|             | $r_1$           | $r_2 > r_1$   |          |
| DeepSets    | 82.50 (20.20)   | 53.49 (13.93) | 31       |
| DR-RBF      | 32.09 (5.78)    | 41.15 (11.81) | 58       |
| DR-Matern32 | 33.79 (5.16)    | 40.20 (12.45) | 55       |
| DR-GA       | 31.61 (5.60)    | 39.17 (13.87) | 68       |
| KES         | 16.57 (4.86)    | 4.20 (0.79)   | 49       |
| SES         | 15.75 (2.65)    | 4.44 (1.36)   | 120      |

Table 4: Rough volatility example.

| Model       | Predictive MAPE |               |               | Time (min) |      |       |
|-------------|-----------------|---------------|---------------|------------|------|-------|
|             | N=20            | N=50          | N=100         | N=20       | N=50 | N=100 |
| DeepSets    | 44.85 (17.80)   | 44.75 (17.93) | 45.00 (18.21) | 1.31       | 1.86 | 2.68  |
| DR-RBF      | 43.86 (13.36)   | 45.54 (10.05) | 41.00 (12.98) | 0.71       | 1.38 | 7.50  |
| DR-Matern32 | 40.97 (10.81)   | 43.59 (9.79)  | 35.35 (9.18)  | 0.73       | 1.00 | 7.80  |
| DR-GA       | 11.94 (7.14)    | 9.54 (6.85)   | 5.51 (2.78)   | 0.68       | 2.60 | 9.80  |
| KES         | 6.12 (1.00)     | 2.83 (0.49)   | 2.07 (0.42)   | 0.71       | 4.00 | 15.50 |
| SES         | 6.67 (3.35)     | 3.58 (0.84)   | 2.14 (0.62)   | 0.60       | 0.65 | 0.78  |

## C.2 Interpretability

When dealing with complex data-streams, cause-effect relations between the different path-coordinates might be an essential feature that one wishes to extract from the signal. Intrinsic in the definition of the signature is the concept of iterated integral of a path over an ordered set of time indices  $a < u_1 < \dots < u_k < T$ . This ordering of the domain of integration, naturally captures causal dependencies between the coordinate-paths  $x^{(i_1)}, \dots, x^{(i_k)}$ .

Taking this property into account, we revisit the crop yield prediction example (see Sec. 5.4 in the main paper, and Fig. 3) to show how the iterated integrals from the signature (of the pathwise expected signature) provide interpretable predictive features, in the context of *distribution regression* (DR) with SES. For this, we replace the climatic variables by two distinct multi-spectral reflectance signals: 1) near-infrared (nR) spectral band; 2) red (R) spectral band Huete et al. (2002). These two signals are recorded at a much lower temporal resolution than the climatic variables, and are typically used to assess the health-status of a plant or crop, classically summarized by the *normalized difference vegetation index* (NDVI) Huete et al. (2002). To carry out this experiment, we use a publicly available dataset Hubert-Moy et al. (2019) which contains multi-spectral time-series corresponding to geo-referenced French wheat fields from 2006 to 2017, and consider these field-level longitudinal observations to predict regional yields (still obtained from the Eurostat database).<sup>4</sup> Instead of relying on a predefined vegetation index signal, such as the aforementioned NDVI :  $t \mapsto (x_t^{nR} - x_t^R)/(x_t^{nR} + x_t^R)$ , we use the raw signals in the form of 2-dimensional paths  $x : t \mapsto x_t = (x_t^{nR}, x_t^R)$  to perform a Lasso DR with SES.

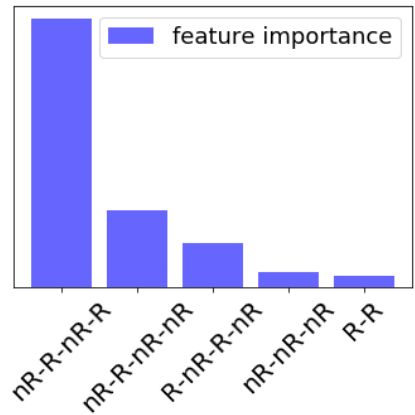

Figure 2: The 5 most predictive features provided by (Lasso) SES for the task of crop yield prediction.

**Interpretation** Chlorophyll strongly absorbs light at wavelengths around  $0.67\mu m$  (red) and reflects strongly in green light, therefore our eyes perceive healthy vegetation as green. Healthy plants have a high reflectance in the near-infrared between  $0.7$  and  $1.3\mu m$ . This is primarily due to healthy internal structure of plant leaves Rahman et al. (2004). Therefore, this absorption-reflection cycle can be seen as a good indicator of the health of crops. Intuitively, the healthier the crops, the higher the crop-yield will be at the end of the season. It is clear from Fig. 2 that the feature in the signature that gets selected by the Lasso penalization mechanism corresponds to a double red-infrared cycle, as described above. This simple example shows how the terms of the signature are not only good predictors, but also carry a natural interpretability that can help getting a better understanding of the underlying physical phenomena.

<sup>4</sup><http://ec.europa.eu/eurostat/data/database>

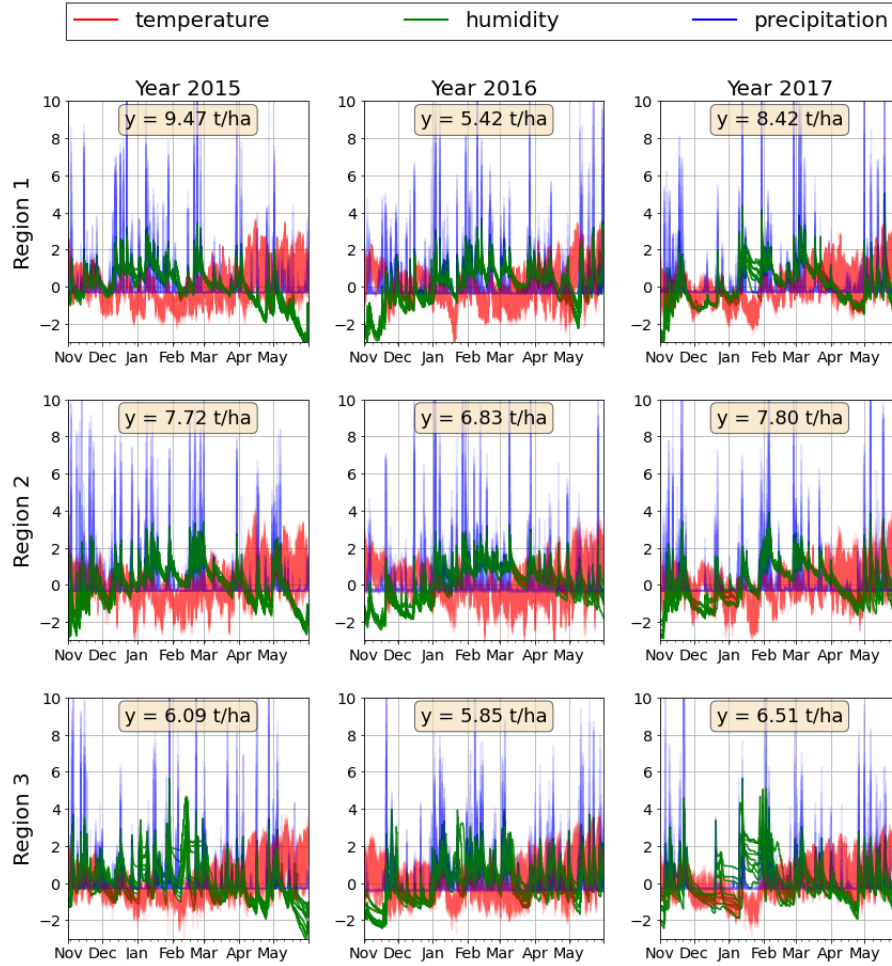

Figure 3: GLDAS/Eurostat dataset. Each panel shows the normalized time-series of temperature, humidity and precipitation, measured over 10 different locations across a region within a year.

## References

- Chevyrev, I. and Kormilitzin, A. (2016). A primer on the signature method in machine learning. *arXiv preprint arXiv:1603.03788*.
- Chevyrev, I., Lyons, T., et al. (2016). Characteristic functions of measures on geometric rough paths. *The Annals of Probability*, 44(6):4049–4082.
- Chevyrev, I. and Oberhauser, H. (2018). Signature moments to characterize laws of stochastic processes. *arXiv preprint arXiv:1810.10971*.
- Cuturi, M. and Blondel, M. (2017). Soft-dtw: a differentiable loss function for time-series. In *International Conference on Machine Learning*, pages 894–903. PMLR.
- Fawcett, T. (2002). *Problems in stochastic analysis: Connections between rough paths and non-commutative harmonic analysis*. PhD thesis, University of Oxford.
- Hubert-Moy, L., Thibault, J., Fabre, E., Roze, C., Arvor, D., Corpetti, T., and Rapinel, S. (2019). Time-series spectral dataset for croplands in france (2006–2017). *Data in brief*, 27:104810.
- Huete, A., Didan, K., Miura, T., Rodriguez, E. P., Gao, X., and Ferreira, L. G. (2002). Overview of the radiometric and biophysical performance of the modis vegetation indices. *Remote sensing of environment*, 83(1-2):195–213.
- Kidger, P. and Lyons, T. (2020). Signatory: differentiable computations of the signature and logsignature transforms, on both CPU and GPU. *arXiv:2001.00706*.

- 
- Lyons, T. (2010). Coropa computational rough paths (software library).
- Lyons, T. J., Caruana, M., and Lévy, T. (2007). *Differential equations driven by rough paths*. Springer.
- Pedregosa, F., Varoquaux, G., Gramfort, A., Michel, V., Thirion, B., Grisel, O., Blondel, M., Prettenhofer, P., Weiss, R., Dubourg, V., Vanderplas, J., Passos, A., Cournapeau, D., Brucher, M., Perrot, M., and Duchesnay, E. (2011). Scikit-learn: Machine learning in Python. *Journal of Machine Learning Research*, 12:2825–2830.
- Rahman, M. R., Islam, A., and Rahman, M. A. (2004). Ndvi derived sugarcane area identification and crop condition assessment. *Plan Plus*, 1(2):1–12.
- Reizenstein, J. and Graham, B. (2020). The iisignature library: efficient calculation of iterated-integral signatures and log signatures. *ACM Trans. Math. Softw.*, 46(1):8:1–8:21.
- Villani, C. (2008). *Optimal transport: old and new*, volume 338. Springer Science & Business Media.
